# Supplementary material for: GJB3: a comprehensive biomarker in pan-cancer prognosis and immunotherapy prediction
Source: publisher site journal article supplement (doi:10.18632/aging.205774), 2024-05-07
Supplement: Supplementary file [file aging-v16i9-205774-supplementary-material-SD1.pdf]

## SUPPLEMENTARY TABLES

Supplementary Table 1. List of abbreviations of cancer names used in this study.

| Cancer abbreviations | Corresponding meanings of cancer abbreviations                   |
|----------------------|------------------------------------------------------------------|
| ACC                  | Adrenocortical carcinoma                                         |
| BLCA                 | Bladder urothelial carcinoma                                     |
| BRCA                 | Breast invasive carcinoma                                        |
| CESC                 | Cervical squamous cell carcinoma and endocervical adenocarcinoma |
| CHOL                 | Cholangiocarcinoma                                               |
| COAD                 | Colon adenocarcinoma                                             |
| READ                 | Rectum adenocarcinoma esophageal carcinoma                       |
| DLBC                 | Lymphoid neoplasm diffuse large B-cell lymphoma                  |
| ESCA                 | Esophageal carcinoma                                             |
| GBM                  | Glioblastoma multiforme                                          |
| HNSC                 | Head and neck squamous cell carcinoma                            |
| KICH                 | Kidney chromophobe                                               |
| KIRC                 | Kidney renal clear cell carcinoma                                |
| KIRP                 | Kidney renal papillary cell carcinoma                            |
| LAML                 | Acute myeloid leukemia                                           |
| LGG                  | Brain lower-grade glioma                                         |
| LIHC                 | Liver hepatocellular carcinoma                                   |
| LUAD                 | Lung adenocarcinoma                                              |
| LUSC                 | Lung squamous cell carcinoma                                     |
| MESO                 | Mesothelioma                                                     |
| OV                   | Ovarian serous cystadenocarcinoma                                |
| PAAD                 | Pancreatic adenocarcinoma                                        |
| PCPG                 | Pheochromocytoma and paraganglioma                               |
| PRAD                 | Prostate adenocarcinoma                                          |
| READ                 | Rectum adenocarcinoma                                            |
| SARC                 | Sarcoma                                                          |
| SKCM                 | Skin cutaneous melanoma                                          |
| STAD                 | Stomach adenocarcinoma                                           |
| STES                 | Stomach and esophageal carcinoma                                 |
| TGCT                 | Testicular germ cell tumors                                      |
| THCA                 | Thyroid carcinoma                                                |
| THYM                 | Thymoma                                                          |
| UCEC                 | Uterine corpus endometrial carcinoma                             |
| UVM                  | Uveal melanoma                                                   |

**Supplementary Table 2. The primer sequences and siRNA sequences used in this study.**

---

|             |         |                         |
|-------------|---------|-------------------------|
| GJB3        | Forward | CCTCCTCCTATGGACTGCCC    |
|             | Reverse | AAGGCCGTGAAGTCTGGGATA   |
| GAPDH       | Forward | GGAGCGAGATCCCTCCAAAAT   |
|             | Reverse | GGCTGTTGTCATACTTCTCATGG |
| GJB3 siRNA1 | Forward | CAAGCGAAUUAACUAUCUACG   |
|             | Reverse | UAGAUAGUUAUUUCGCUUGUU   |
| siRNA2      | Forward | CUCUGAGUUCACUAAGUUAUG   |
|             | Reverse | UAACUUAGUGAACUCAGAGUG   |
| siRNA3      | Forward | CCAACGUCUGCUACGACAACU   |
|             | Reverse | UUGUCGUAGCAGACGUUGGUG   |

---
